# Supplementary material for: Design and optimization of an ultra-sensitive hairpin DNA aptasensor for Salmonella detection
Source: Royal Society of Chemistry journal article supplement (doi:10.1039/c7ra06000a), 2017-01-01
Supplement: c7ra06000a1.pdf [file c7ra06000a1.pdf]

## Electronic Supplementary Materials (ESI)

### Design and Optimization of an Ultra-Sensitive Hairpin DNA aptasensor for Salmonella Detection

Jayeon Lee<sup>a, b</sup>, Juyeon Jung<sup>a, b</sup>, Chang Soo Lee<sup>a, b\*</sup> and Tai Hwan Ha<sup>a, b\*</sup>

<sup>a</sup> Department of Nahobiotechnology, KRIBB school of Biotechnology, Korea University of Science & Technology, Daejeon 34141,  
Republic of Korea

<sup>b</sup> Hazards Monitoring BNT Research Center, Korea Research Institute of Bioscience and Biotechnology (KRIBB), Daejeon 34141, Republic  
of Korea; \*E-mail: taihwan@kribb.re.kr

#### 1. Binding affinity of EAD2-hemin complex

2  $\mu$ M hemin was prepared in 50 mM tris-HCl (pH 7.4), 100 mM NaCl, 5 mM KCl and 1 mM MgCl<sub>2</sub>. EAD2 was dissolved in same buffer. Hemin was mixed with various concentration of EAD2 and stood for at least an hour, and the dissociation constant ( $K_d$ ) for the DNA-hemin complexes was determined by plotting the absorbance changes of hemin at 404nm against DNA concentrations (0 -10  $\mu$ M). The  $K_d$  for EAD2 was determined to be

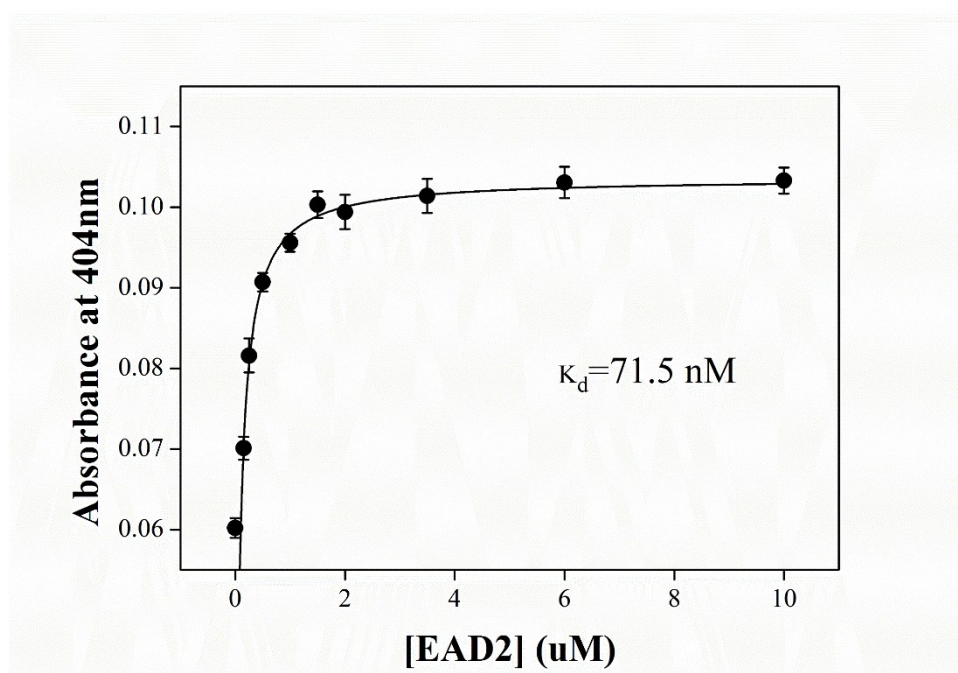

Figure S1. A plot for obtaining the dissociation constant for EAD2-hemin complex

71.5 nM.

## 2. Kinetics of SHDs

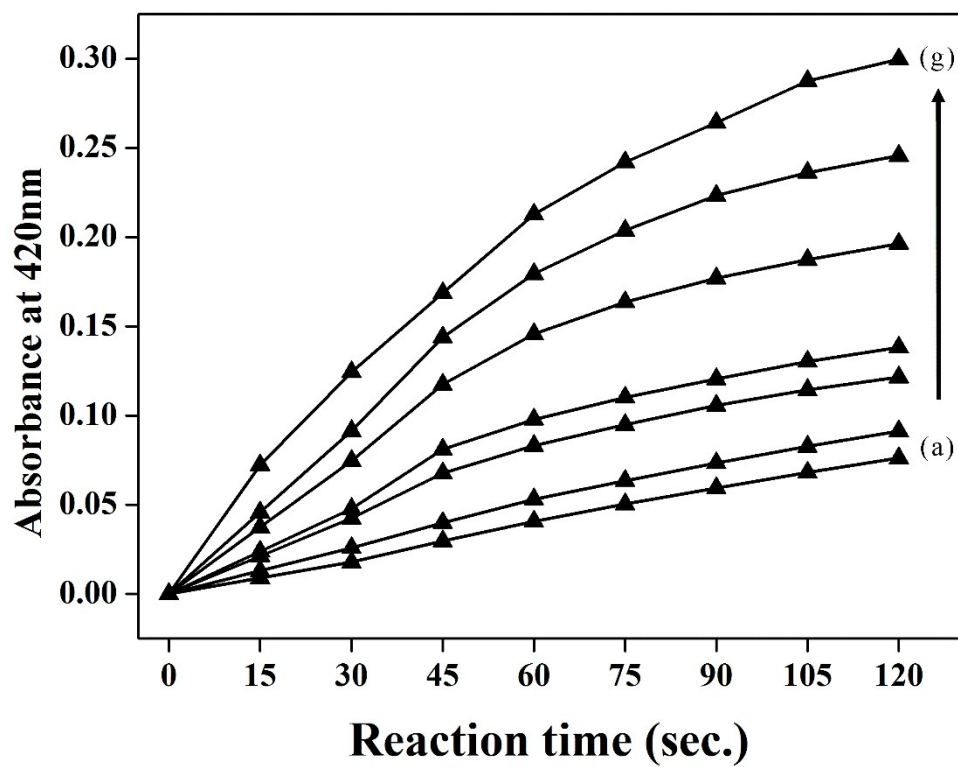

**Figure S2.1.** Time-dependent Absorbance change of SHD<sub>4</sub> with different concentration of *S. Typhimurium*. Blank (a)  $1 \times 10^7$  CFU/mL (b)  $2 \times 10^7$  CFU/mL (c)  $3.8 \times 10^7$  CFU/mL (d)  $7 \times 10^7$  CFU/mL (e)  $1 \times 10^8$  CFU/mL (f)  $1.5 \times 10^8$  CFU/mL (g). [SHD<sub>4</sub>] = 100nM, [hemin] = 300nM

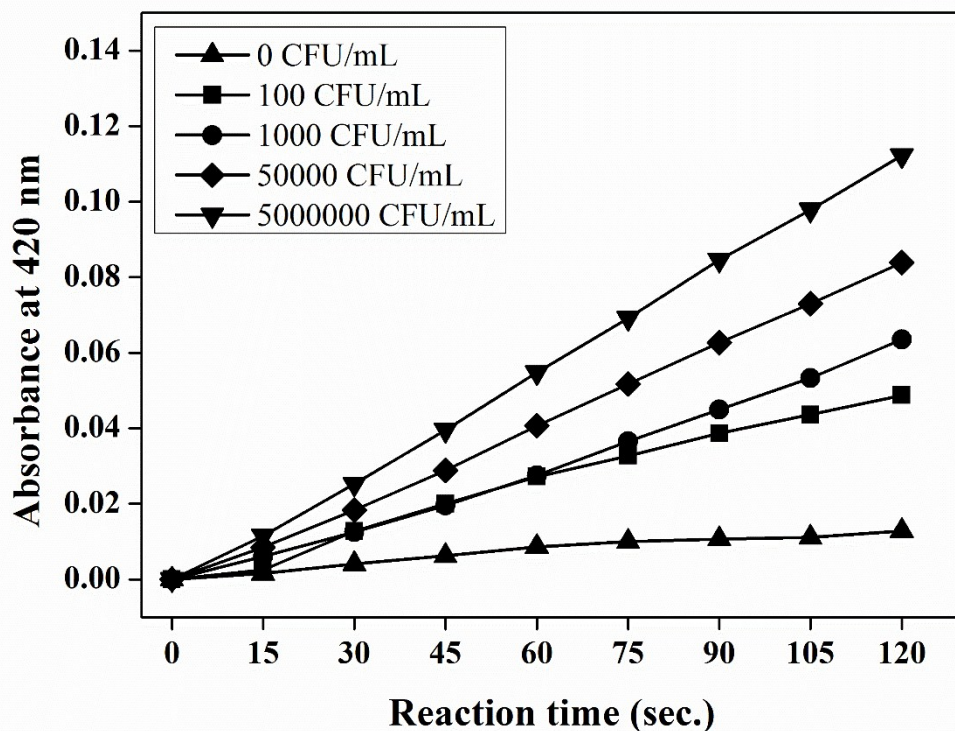

Figure S2.2. Time-dependent Absorbance change of *hem*-SHD<sub>2</sub> with different concentration of *S. Typhimurium*. [*hem*-SHD<sub>2</sub>]= 200nM

### 3. CL inhibition of *p*-coumaric acid

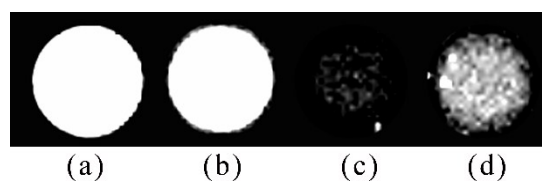

Figure S3. An accumulated CL image of reaction of 1  $\mu$ M hemin mixture with 2mM of luminol and H<sub>2</sub>O<sub>2</sub> (a), 1  $\mu$ M EAD2-hemin mixture with 2mM luminol and H<sub>2</sub>O<sub>2</sub> (b), 1  $\mu$ M hemin mixture with 2mM luminol, H<sub>2</sub>O<sub>2</sub> and 0.5mM *p*-coumaric acid mixture (c), 1  $\mu$ M EAD2-hemin mixture with 1mM luminol, H<sub>2</sub>O<sub>2</sub> and 0.5mM *p*-coumaric acid(d). / CL accumulation time: 107sec.

### 4. Real sample tests

In prior to test the applicability of SHDs in real samples, we examined the catalytic activity of EAD2(G-quadruplex)-hemin complex in real samples (Figure S4). The CL intensity generated from EAD2-hemin complex was greatly decreased in the presence of undiluted real samples. To avoid these depression of CL signal, samples were diluted 100 fold and sensitivity test were demonstrated.

**Figure S4.** An accumulated CL image of Luminol-H<sub>2</sub>O<sub>2</sub> reaction of EAD2-hemin complex and pure whole milk (or diluted milk) mixture. CL intensity was suppressed by whole milk. [EAD2]= 200 nM, [hemin]= 1  $\mu$ M, [luminol/H<sub>2</sub>O<sub>2</sub>/p-coumaric acid]= 2mM/2mM/0.5mM/ CL accumulation time: 180sec.

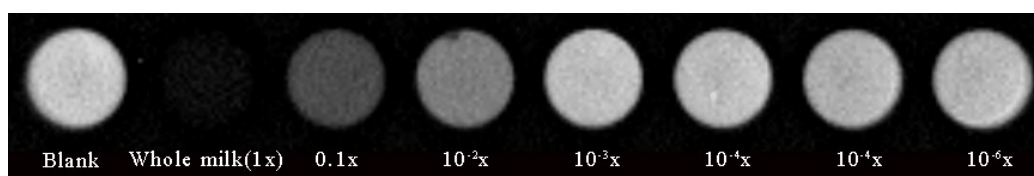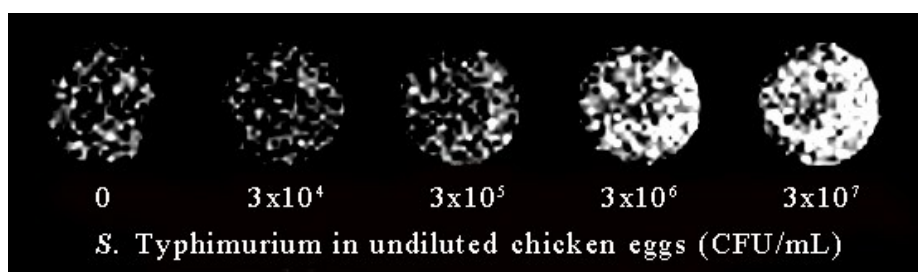

**Figure S5.** An accumulated CL image of Luminol-H<sub>2</sub>O<sub>2</sub> reaction of SHD<sub>3</sub>-hemin complex with *S. Typhimurium* spiked chicken eggs. (100-fold diluted eggs) Concentration of S [EAD2]= 200 nM, [hemin]= 1  $\mu$ M, [luminol/H<sub>2</sub>O<sub>2</sub>/p-coumaric acid]= 2mM/2mM/0.5mM/ CL accumulation time: 180sec.

## 5. Gibbs free energy calculation

**Table S1.** [Hairpin]<sub>0</sub> = 100 nM, [Hemin]<sub>0</sub> = 300 nM

| $\Delta G^{\circ}_{\text{blank}}$ | [Hairpin] | [G-quad] | [Hemin] | efficiency |
|-----------------------------------|-----------|----------|---------|------------|
| - 3.7 kcal/mol                    | 100 nM    | 0.016 nM | 300 nM  | 0.016 %    |
| - 6.0 kcal/mol                    | 99 nM     | 0.75 nM  | 299 nM  | 0.75 %     |
| - 8.0 kcal/mol                    | 83 nM     | 17 nM    | 283 nM  | 17 %       |
| - 10.0 kcal/mol                   | 17 nM     | 83 nM    | 217 nM  | 83 %       |

**Table S2. [Hairpin]<sub>0</sub> = 5 μM, [Hemin]<sub>0</sub> = 15 μM**

| $\Delta G^{\circ}_{\text{blank}}$ | [Hairpin] | [G-quad] | [Hemin]   | efficiency |
|-----------------------------------|-----------|----------|-----------|------------|
| - 3.7 kcal/mol                    | 4.962 μM  | 0.038 μM | 14.962 μM | 0.76 %     |
| - 6.0 kcal/mol                    | 3.7 μM    | 1.3 μM   | 13.7 μM   | 26 %       |
| - 8.0 kcal/mol                    | 0.6 μM    | 4.4 μM   | 10.6 μM   | 88 %       |
| - 10.0 kcal/mol                   | 0.02 μM   | 4.98 μM  | 10.02 μM  | 99.6 %     |

**Table S3. [Hairpin]<sub>0</sub> = 100 μM, [Hemin]<sub>0</sub> = 300 μM**

| $\Delta G^{\circ}_{\text{blank}}$ | [Hairpin] | [G-quad] | [Hemin] | efficiency |
|-----------------------------------|-----------|----------|---------|------------|
| - 3.7 kcal/mol                    | 87 μM     | 13 μM    | 287 μM  | 13 %       |
| - 6.0 kcal/mol                    | 16 μM     | 84 μM    | 216 μM  | 84 %       |
| - 8.0 kcal/mol                    | 1 μM      | 99 μM    | 201 μM  | 99 %       |
| - 10.0 kcal/mol                   | 0 μM      | 100 μM   | 200 μM  | 100 %      |

In order to calculate the individual SHD<sub>4</sub> concentration in hairpin state and in G-quadruplex state, we assumed that G-quadruplex formation free energy is – 9.2 kcal/mol and hairpin formation energy is -5.7 kcal/mol. The standard free energy change for the hairpin to turn into G-quadruplex is calculated to be -3.7 kcal/mol,  $\Delta G^{\circ}_{\text{blank}}$ . Bearing the energy in mind, we have calculated the actual hairpin and G-quadruplex concentrations for the given initial hairpin concentration of 100 nM, [hairpin]<sub>0</sub> and hemin concentration of 300 nM, [hemin]<sub>0</sub>: Gas constant R= 8.31447 JK<sup>-1</sup>mol<sup>-1</sup>

$$\Delta G = \Delta G^{\circ}_{\text{blank}} + RT \ln \frac{[G - quad]}{[hairpin][hemin]}$$

while [G-quad]<sub>0</sub> = 0, [hairpin]<sub>0</sub> = 100 nM, [hemin]<sub>0</sub> = 300 nM

At equilibrium,  $\Delta G = 0$ , [G-quad] = x, [hairpin] = [hairpin]<sub>0</sub> – x, [hemin] = [hemin]<sub>0</sub> – x

$$-\Delta G_{\text{blank}}^{\circ} = RT \ln \frac{[G - quad]}{[haripin][hemin]},$$

$$3.7 \text{ kcal/mol} \cdot 4186 \text{ J/kcal} = RT \ln \frac{x \cdot 10^9}{(100 - x)(300 - x)}$$

Solving the quadratic equation yields an exact solution for the G-quadruplex concentration at equilibrium, and results at diverse initial concentrations and  $\Delta G_{\text{blank}}^{\circ}$  from -3.7 kcal/mol to -10 kcal/mol were summarized in Table 1, 2, and 3 in the above.
